112. Günal I, Köse N, Gürer D: Compartment syndrome after intraosseous infusion: An experimental study in dogs. *J Pediatr Surg* 1996; 31:1491–3
113. Whitenack SH, Hausberger FX: Intravasation of fat from the bone marrow cavity. *Am J Pathol* 1971; 65:335–45
114. Hasan MY, Kissoon N, Khan TM, Saldajeno V, Goldstein J, Murphy SP: Intraosseous infusion and pulmonary fat embolism. *Pediatr Crit Care Med* 2001; 2:133–8
115. Fiallos M, Kissoon N, Abdelmoneim T, Johnson L, Murphy S, Lu L, Masood S, Idris A: Fat embolism with the use of intraosseous infusion during cardiopulmonary resuscitation. *Am J Med Sci* 1997; 314:73–9
116. Eriksson EA, Pellegrini DC, Vanderkolk WE, Minshall CT, Fakhry SM, Cohle SD: Incidence of pulmonary fat embolism at autopsy: An undiagnosed epidemic. *J Trauma* 2011; 71:312–5
117. Thomas ML, Tighe JR: Death from fat embolism as a complication of intraosseous phlebography. *Lancet* 1973; 2:1415–6
118. La Fleche FR, Slepkin MJ, Vargas J, Milzman DP: Iatrogenic bilateral tibial fractures after intraosseous infusion attempts in a 3-month-old infant. *Ann Emerg Med* 1989; 18:1099–101
119. Bowley DM, Loveland J, Pitcher GJ: Tibial fracture as a complication of intraosseous infusion during pediatric resuscitation. *J Trauma* 2003; 55:786–7
120. Pollack CV Jr, Pender ES, Woodall BN, Tubbs RC, Iyer RV, Miller HW: Long-term local effects of intraosseous infusion on tibial bone marrow in the weanling pig model. *Am J Emerg Med* 1992; 10:27–31
121. Woodall BN, Pender ES, Pollack CV Jr, Miller H, Tubbs RC, Andrew ME: Intraosseous infusion of resuscitative fluids and drugs: Long-term effect on linear bone growth in pigs. *South Med J* 1992; 85:820–4
122. Brickman KR, Rega P, Schoolfield L, Harkins K, Weisbrode SE, Reynolds G: Investigation of bone developmental and histopathologic changes from intraosseous infusion. *Ann Emerg Med* 1996; 28:430–5
123. Claudet I, Baunin C, Laporte-Turpin E, Marcoux MO, Grouteau E, Cahuzac JP: Long-term effects on tibial growth after intraosseous infusion: A prospective, radiographic analysis. *Pediatr Emerg Care* 2003; 19:397–401
124. Fiser RT, Walker WM, Seibert JJ, McCarthy R, Fiser DH: Tibial length following intraosseous infusion: A prospective, radiographic analysis. *Pediatr Emerg Care* 1997; 13:186–8

## ANESTHESIOLOGY REFLECTIONS FROM THE WOOD LIBRARY-MUSEUM

### Hasbrouck's Advertising "Proposal" for "Use of Nitrous Oxide"

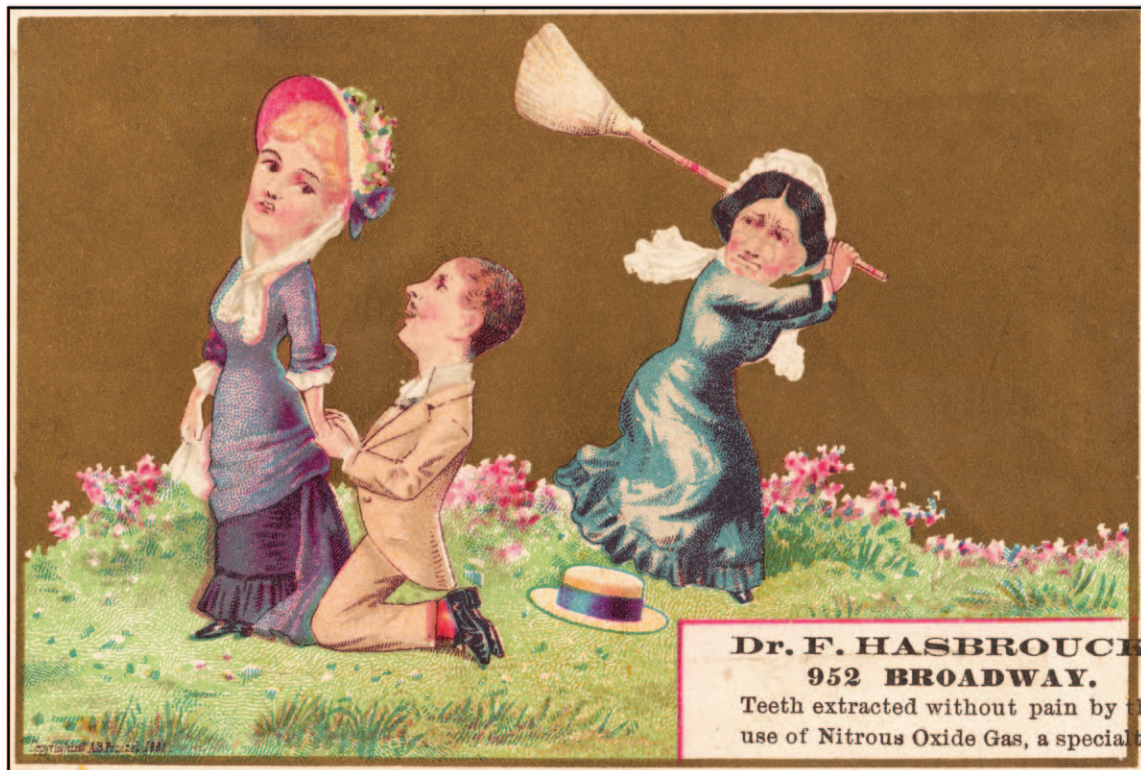

Eventually notorious as the dentist-anesthetist for the secret shipboard surgery in 1893 to treat U.S. President Grover Cleveland's oral cancer, Dr. Ferdinand Hasbrouck was one of many professionals who shared use of this same stock illustration (*above*), an image copyrighted by A. B. Frenzel in 1881. Sadly, Dr. Hasbrouck failed to center his personal stamping (*lower right*), which advertised that teeth were "extracted without pain by the use of Nitrous Oxide Gas, a specialty." Depicting a broom-wielding lady menacing a young man proposing marriage to her rival or relative, this trade card is part of the WLM's Ben Z. Swanson Collection. (Copyright © the American Society of Anesthesiologists, Inc.)

George S. Bause, M.D., M.P.H., Honorary Curator, ASA's Wood Library-Museum of Anesthesiology, Park Ridge, Illinois, and Clinical Associate Professor, Case Western Reserve University, Cleveland, Ohio. UJYC@aol.com.
